# Supplementary material for: E-cadherin expression as a prognostic factor in patients with ovarian cancer: a meta-analysis
Source: PubMed Central journal article supplement (PMC5655261; doi:10.18632/oncotarget.18898), 2017-06-30
Supplement: oncotarget-08-81052-s001.pdf [file oncotarget-08-81052-s001.pdf]

# E-cadherin expression as a prognostic factor in patients with ovarian cancer: a meta-analysis

## Supplementary Materials

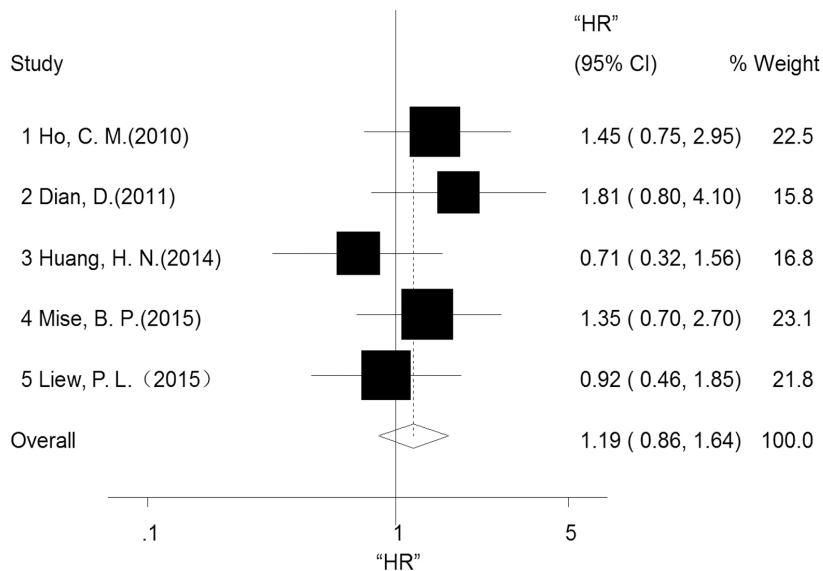

Supplementary Figure 1: Forest plot shows the relation of negative E-cadherin expression with PFS of patients with ovarian cancer.

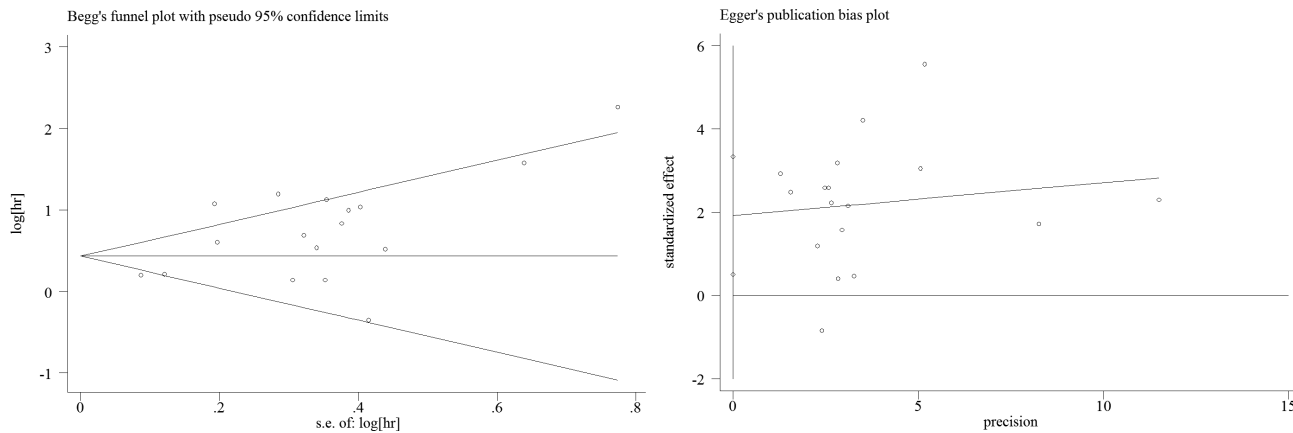

Supplementary Figure 2: Begg's and Egger's funnel plot evaluated the publication bias of the selected studies.

**Supplementary Table 1: Quality assessment of studies (for cohort studies)**

| Studyid                        | Selection                                |                                     |                           | Demonstration That Outcome of Interest Was Not Present at Start of Study | Comparability                                                   |                       | Outcome                                         |                                  | Total Points |
|--------------------------------|------------------------------------------|-------------------------------------|---------------------------|--------------------------------------------------------------------------|-----------------------------------------------------------------|-----------------------|-------------------------------------------------|----------------------------------|--------------|
|                                | Representativeness of the Exposed Cohort | Selection of the Non-Exposed Cohort | Ascertainment of Exposure |                                                                          | Comparability of Cohorts on the Basis of the Design or Analysis | Assessment of Outcome | Was Follow-Up Long Enough for Outcomes to Occur | Adequacy of Follow Up of Cohorts |              |
| 1 Darai, E. (1996)             | *                                        | *                                   | *                         | *                                                                        | **                                                              | *                     | *                                               | *                                | 7*           |
| 2 Faleiro Rodrigues, C. (2004) | *                                        | *                                   | *                         | *                                                                        | *                                                               | *                     | *                                               | *                                | 8*           |
| 3 Voutilainen, K. A. (2006)    | *                                        | *                                   | *                         | *                                                                        | *                                                               | *                     | *                                               | *                                | 8*           |
| 4 Cho, E. Y. (2006)            | *                                        | *                                   | *                         | *                                                                        | *                                                               | *                     | *                                               | *                                | 8*           |
| 5 Blechschmidt, K. (2008)      | *                                        | *                                   | *                         | *                                                                        | *                                                               | *                     | *                                               | *                                | 8*           |
| 6 Shim, H. S. (2009)           | *                                        | *                                   | *                         | *                                                                        | **                                                              | *                     | *                                               | *                                | 8*           |
| 7 Ho, C. M. (2010)             | *                                        | *                                   | *                         | *                                                                        | *                                                               | *                     | *                                               | *                                | 6*           |
| 8 Dian, D. (2011)              | *                                        | *                                   | *                         | *                                                                        | **                                                              | *                     | *                                               | *                                | 9*           |
| 9 Huang, K. J. (2012)          | *                                        | *                                   | *                         | *                                                                        | *                                                               | *                     | *                                               | *                                | 5*           |
| 10 Taskin S. (2012)            | *                                        | *                                   | *                         | *                                                                        | *                                                               | *                     | *                                               | *                                | 6*           |
| 11 Bacic, B. (2013)            | *                                        | *                                   | *                         | *                                                                        | *                                                               | *                     | *                                               | *                                | 8*           |
| 12 Huang, H. N. (2014)         | *                                        | *                                   | *                         | *                                                                        | **                                                              | *                     | *                                               | *                                | 9*           |
| 13 Wang, Y. (2014)             | *                                        | *                                   | *                         | *                                                                        | **                                                              | *                     | *                                               | *                                | 7*           |
| 14 Mise, B. P. (2015)          | *                                        | *                                   | *                         | *                                                                        | **                                                              | *                     | *                                               | *                                | 9*           |
| 15 Liew, P. L. (2015)          | *                                        | *                                   | *                         | *                                                                        | *                                                               | *                     | *                                               | *                                | 6*           |
| 16 Yu, L. (2015)               | *                                        | *                                   | *                         | *                                                                        | **                                                              | *                     | *                                               | *                                | 8*           |
| 17 Sundov D. (2017)            | *                                        | *                                   | *                         | *                                                                        | *                                                               | *                     | *                                               | *                                | 6*           |

**Supplementary Table 2: Subgroup analysis of negative E-cadherin and prognosis of ovarian cancer patients**

| Stratified Analysis    | No. of Study | Pools HR (95% CI)  | p-value | I <sup>2</sup> | Heterogeneity p-value |
|------------------------|--------------|--------------------|---------|----------------|-----------------------|
| <b>No. of Patients</b> |              |                    |         |                |                       |
| ≤ 90                   | 9            | 2.19 (1.49,3.22)   | < 0.001 | 80.9%          | < 0.001               |
| > 90                   | 8            | 1.41 (1.18,1.69)   | < 0.001 | 31.4%          | 0.177                 |
| <b>Years</b>           |              |                    |         |                |                       |
| 1996–2011              | 8            | 1.59 (1.26, 2.00 ) | < 0.001 | 50.9%          | 0.047                 |
| 2012–2017              | 9            | 2.08 (1.42,3.07)   | < 0.001 | 67.4%          | 0.002                 |
| <b>Cut-off Value</b>   |              |                    |         |                |                       |
| 10%                    | 9            | 1.96 (1.40,2.74)   | < 0.001 | 80.7%          | < 0.001               |
| Others                 | 8            | 1.73 (1.38,2.18 )  | < 0.001 | 35.6%          | 0.144                 |
| <b>Antibody</b>        |              |                    |         |                |                       |
| DAKO, Denmark          | 8            | 1.94 (1.39,2.70)   | < 0.001 | 51.8%          | 0.042                 |
| Others                 | 9            | 1.87 (1.36,2.57)   | < 0.001 | 75.7%          | < 0.001               |
| <b>Study Location</b>  |              |                    |         |                |                       |
| Europe                 | 9            | 2.49 (1.62,3.82)   | < 0.001 | 74.6%          | < 0.001               |
| Asia                   | 8            | 1.57 (1.15, 2.15)  | 0.004   | 68.3%          | 0.002                 |
